# Supplementary material for: A Systematic Review of Complementary and Alternative Veterinary Medicine: “Miscellaneous Therapies”
Source: MDPI journal article supplement (doi:10.3390/ani11123356), 2021-11-24
Supplement: s1 [file s1]

## A Systematic Review of Complementary and Alternative Veterinary Medicine: “Miscellaneous Therapies”

Anna Bergh, Iréne Lund, Anna Boström, Heli Hyytiäinen, and Kjell Asplund

### Manual for assessment of risk of bias and relevance

Use separate templates for controlled trials (randomized or non-randomized) and observational studies.

Use the following grades: 0–5 or 1–5. For items with only three grades described (0,3,5), intermediate grades (1,2,4) may also be used.

#### **Study design, controlled trials**

- 1 = non-randomized controlled trial, non-adequate control group
- 2 = non-randomized controlled trial, adequate control group
- 3 = quasirandomized trial
- 4 = randomized controlled trial, randomization with flaws
- 5 = randomized controlled trial, randomization without flaws

#### **Study design, observational studies**

- 1 = case study
- 2 = cross-sectional
- 3 = case-control
- 4 = retrospective cohort
- 5 = prospective cohort

#### **Statistical power**

Statistical power is considered sufficient if (a) a power calculation is reported and the according number of animals have been included, *or* (b) if the principal endpoint is statistically different between groups (or corresponding):

- 0 = Not sufficiently powered statistically to detect an effect *or* not possible to assess.
- 3 = Possibly sufficiently powered to detect an effect but difficult to assess.
- 5 = Sufficiently powered to detect an effect.

#### **Confounding (observational studies only)**

What impact may potential confounding (e.g., concurrent other treatment) have had on the results?

- 0 = severe or not reported
- 3 = moderate
- 5 = none/of marginal importance

#### **Selection/classification (observational studies only)**

How well were intervention groups defined/delineated?

Was there a risk that groups were defined after the results were known?

- 0 = high risk of selection/classification bias or cannot be assessed

3 = intermediate risk of selection/classification bias  
5 = no risk of risk of selection/classification bias

### **Deviation from planned therapy**

This item is assessed by weighing the answers to four questions:

- Were crossovers or other deviations from planned therapy not reported?
- Was there substantial crossover (>10 percent) between intervention/control groups
- Were there other serious deviations from planned therapies?
- If deviations occurred, were they importantly unbalanced between the groups?

0 = large deviations from planned therapy *or* markedly imbalanced proportions with deviations between comparison groups *or* not reported

3 = moderate deviations from planned therapy

5 = no or only minor deviations from planned therapy

### **Lost to follow-up**

- What proportion was lost to follow-up?
- Was loss to follow-up balanced between the groups?

0 = proportion lost to follow-up  $\geq 40\%$  or large imbalance between groups

3 = proportion lost to follow-up 20-39%, little imbalance between groups

5 = proportion lost to follow-up 0-19%, little imbalance between groups

### **Outcome assessment**

0 = assessor aware of what group the animals had been assigned to

3 = assessor aware of what group the animals had been assigned to but, probably, this did not have any major effect on results

5 = independent assessment of outcome (assessor unaware of treatment group, *or* laboratory, physiological or similar measurements)

If “objective” outcomes were not used, include information on who performed the assessments: the therapist (T), the animal owner (AO), blinded assessor (BA), or other (O).

### **Relevance**

Whereas the items used for risk-of-bias scoring are about internal validity of the study, relevance is about external validity. For the sake of simplicity, it is here included as a risk-of-bias item but may also be reported separately when the systematic reviews are compiled.

To what extent are the study results transferable to the Swedish setting?

0 = low relevance

3 = intermediate relevance

5 = high relevance

### **Overall assessment of risk of bias**

A very serious bias in one item cannot be counterbalanced by high scores in other items. Therefore, the overall assessment of risk of bias is qualitative; an arithmetic summary score is only to be used as guidance.

The following risk-of-bias categories are used:

- low

- low-to-moderate
- moderate
- moderate-to-high
- high

## References

Higgins J, Thomas J (eds,): Cochrane Handbook for Systematic Reviews of Interventions, version 6.2, 2021. <https://training.cochrane.org/handbook/current>.

Statens Beredning för Medicinsk och Social Utvärdering (SBU). Utvärdering av metoder i hälso- och sjukvården och insatser i socialtjänsten: en metodbok [in Swedish]. Stockholm 2020. Available from: <http://www.sbu.se/met>. A previous version is available in English at [https://www.sbu.se/globalassets/ebm/metodbok/eng\\_metodboken\\_no-longer-in-use.pdf](https://www.sbu.se/globalassets/ebm/metodbok/eng_metodboken_no-longer-in-use.pdf).
